# Supplementary material
Source: PubMed Central journal article supplement (PMC3221309)
Supplement: NIHMS274858-supplement-01.pdf [file NIHMS274858-supplement-01.pdf]

453 Supplementary table 1. Demographic and clinical characteristic of consenting subjects<sup>^</sup>.

|                                                | <b>Overall<sup>*</sup></b> |
|------------------------------------------------|----------------------------|
| <b>Patient number</b>                          | 190 <sup>*</sup>           |
| <b>Demographic</b>                             |                            |
| Median age in years (median, IQR)              | 3 (1.3-15)                 |
| Male (N, %)                                    | 95 (52%)                   |
| Race <sup>**</sup>                             |                            |
| Caucasian (N, %)                               | 64 (35%)                   |
| African American (N, %)                        | 95 (52%)                   |
| Other <sup>^</sup> (N, %)                      | 23 (13%)                   |
| <b>Comorbidity</b>                             |                            |
| Asthma (N, %)                                  | 18 (10%)                   |
| Other chronic lung disease <sup>¥</sup> (N, %) | 11 (6%)                    |
| HIV/AIDS (N, %)                                | 6 (3%)                     |
| Malignancy (N, %)                              | 6 (3%)                     |
| <b>Health care utilization</b>                 |                            |
| Hospitalization <sup>**</sup> (N, %)           | 116 (63%)                  |
| Length of stay in day (Median, IQR)            | 3 (2-5)                    |
| Chest imaging <sup>§</sup> (N, %)              | 22 (12%)                   |
| Positive chest imaging finding (N, %)          | 8 (4%)                     |

454

455

456 Supplementary table 1. Demographic and clinical characteristic of consenting subjects<sup>^</sup>.  
457 Demographic and clinical characteristics of patients consented in respiratory tract  
458 infection season 2007-2008 with access to nasopharyngeal aspirate  
459 <sup>^</sup>3 subjects with only bocavirus detected were excluded.  
460 \*Seven out of 190 subjects have missing data for overall characteristics  
461 \*\*Missing data for one person. Hospitalization defined as admission due to the respiratory  
462 tract infection episode  
463 <sup>^</sup>Other races include Asian, Hispanic and unknown  
464 <sup>^</sup>Other chronic lung disease includes chronic obstructive pulmonary disease, cystic  
465 fibrosis, and other unspecified chronic lung disease  
466 <sup>^</sup>Chest imaging includes plain chest radiograph, chest computed tomography  
467 NA: not applicable, IQR: interquartile range  
468  
469
